# Supplementary material for: Glial degeneration with oxidative damage drives neuronal demise in MPSII disease
Source: PubMed Central journal article supplement (PMC5108318; doi:10.1038/cddis.2016.231), 2016-08-11

# Figure S1

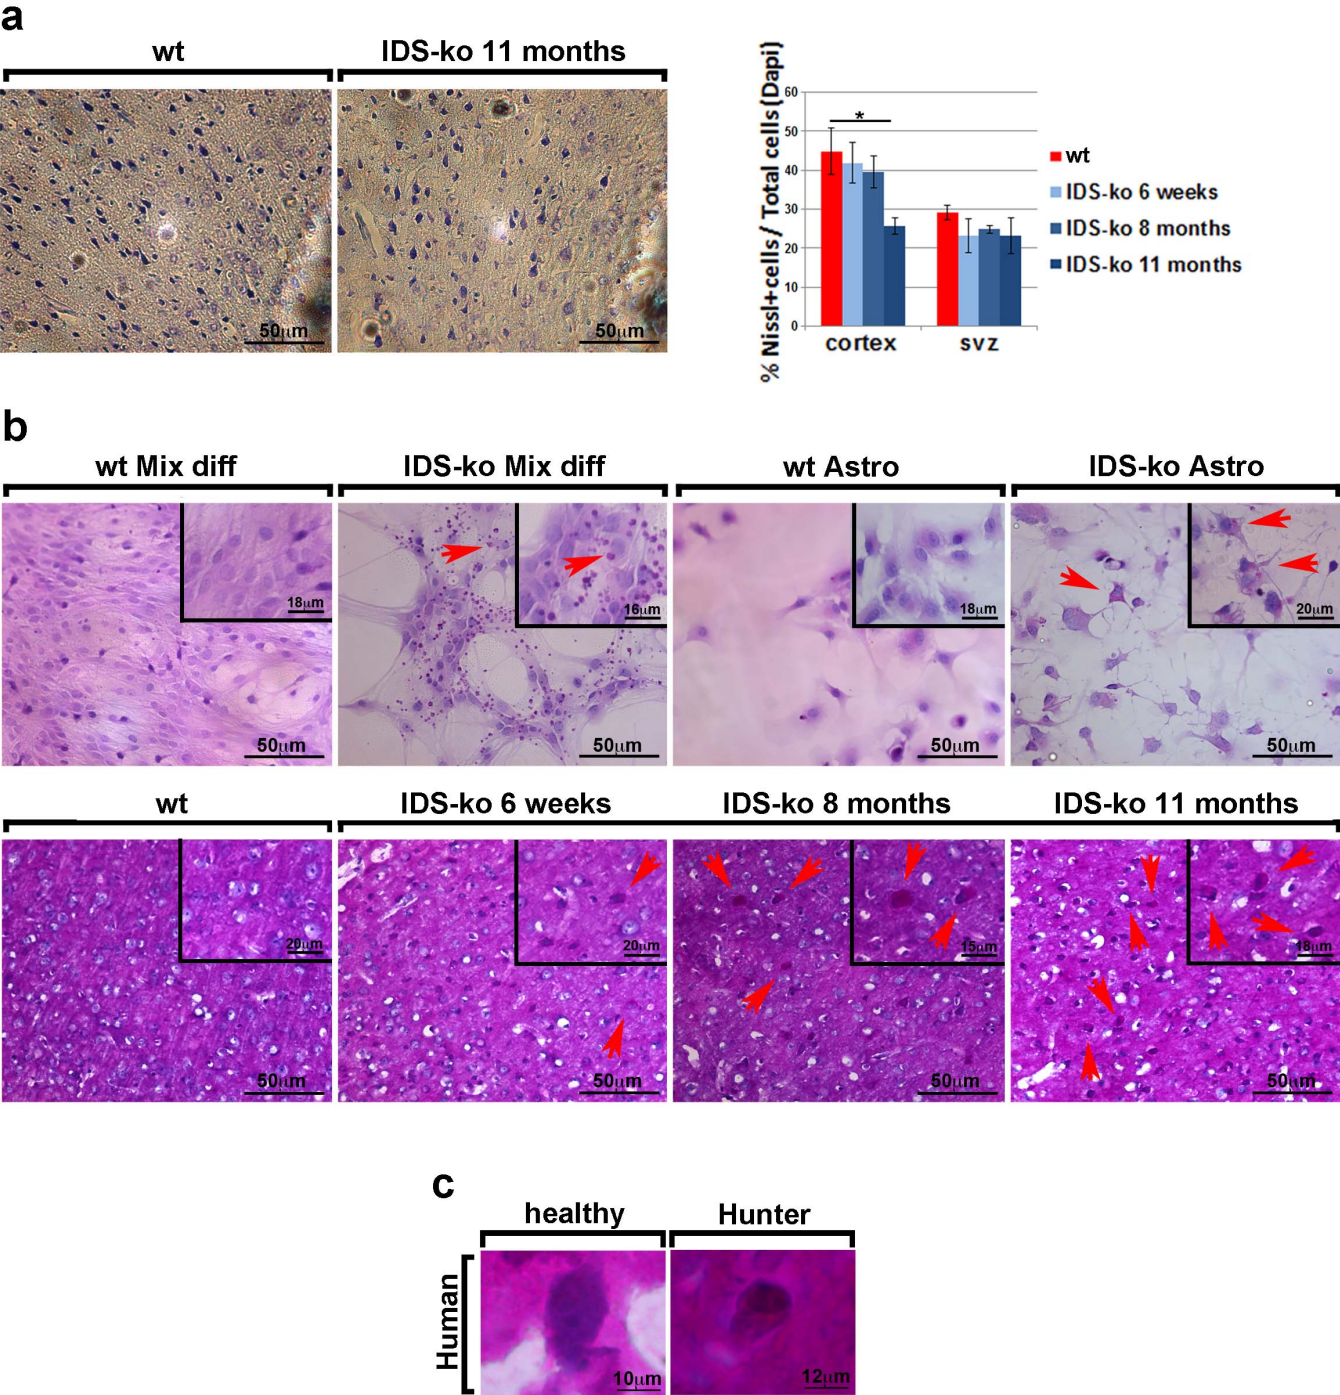

# Figure S2

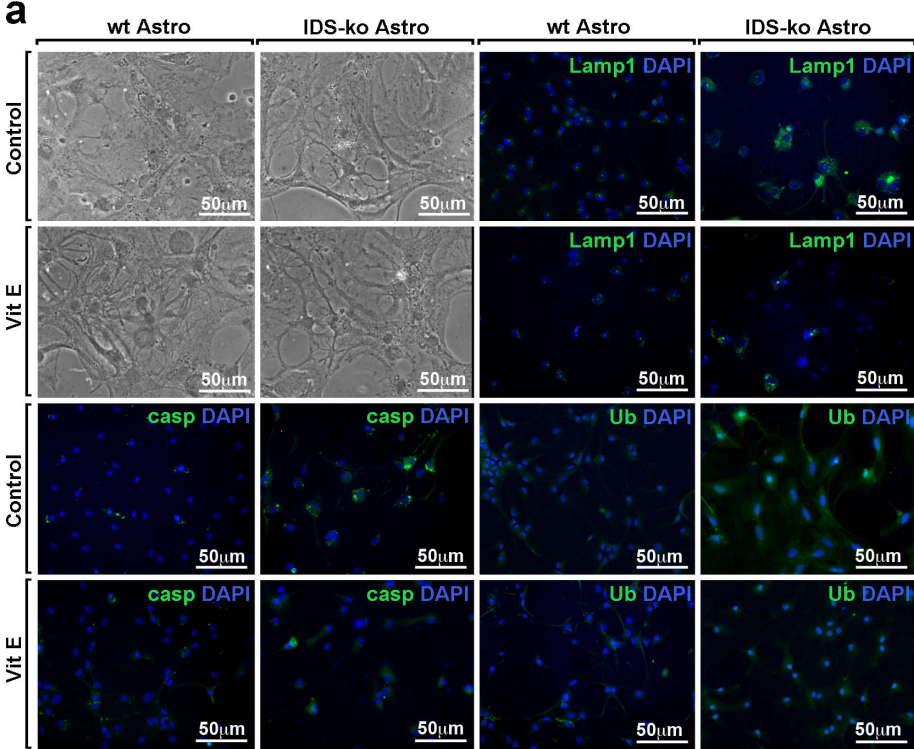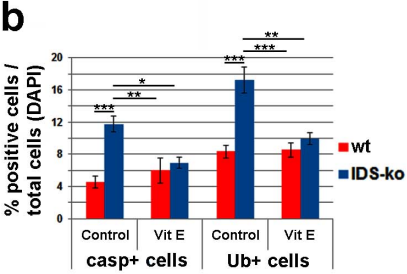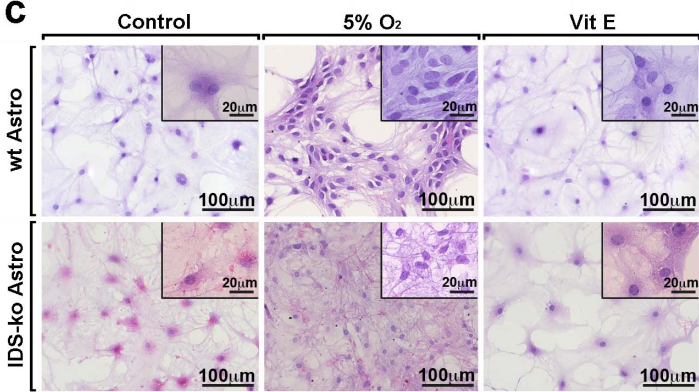

# Figure S3

a

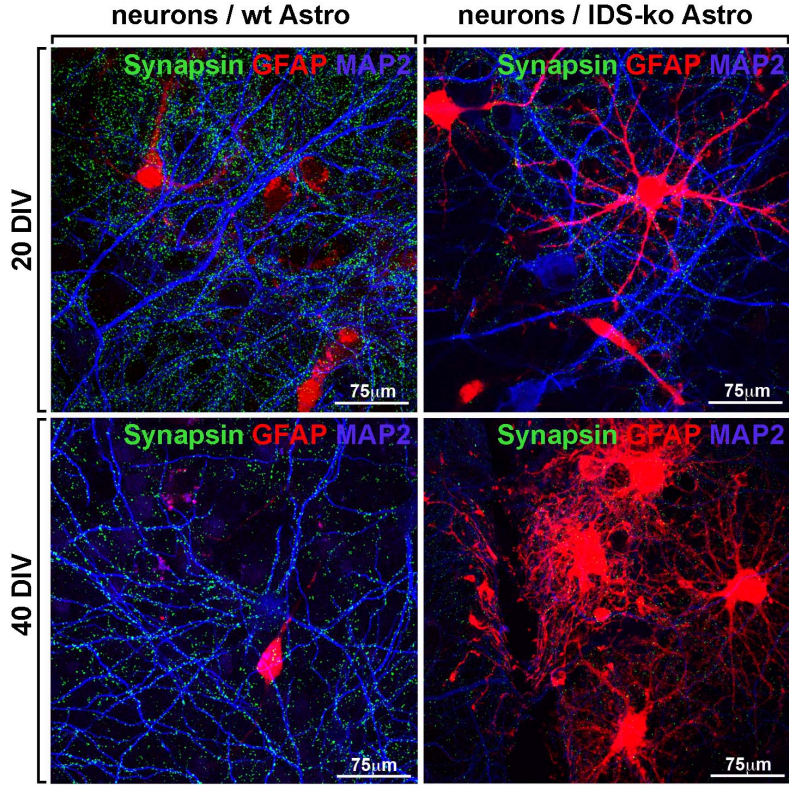

b

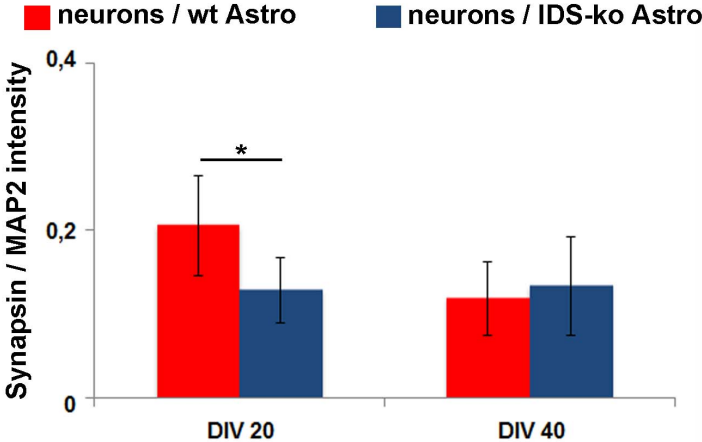

c

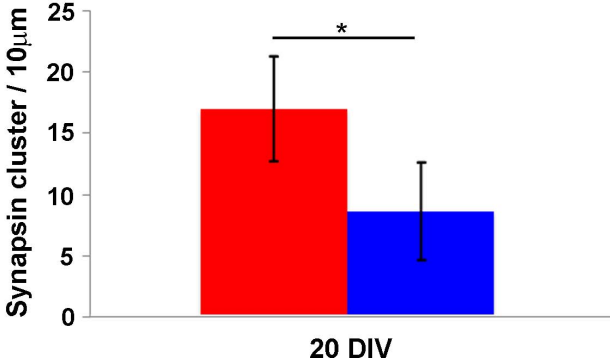

# Figure S4

a

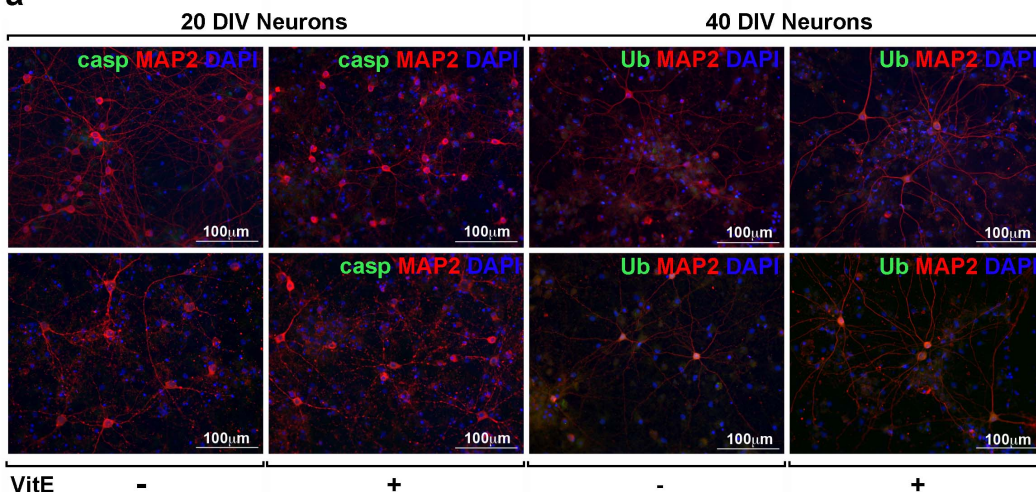

b

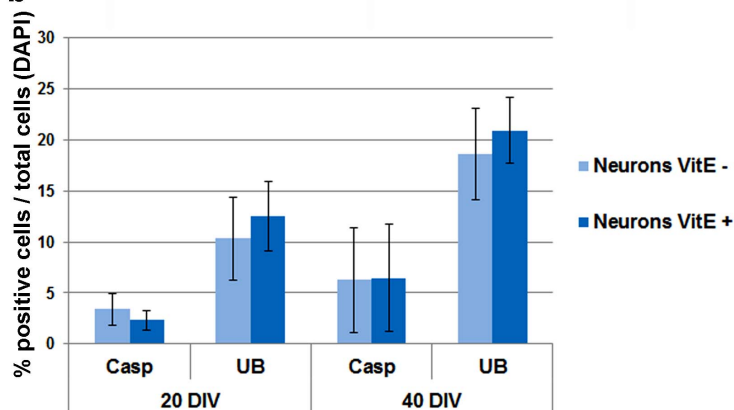

c

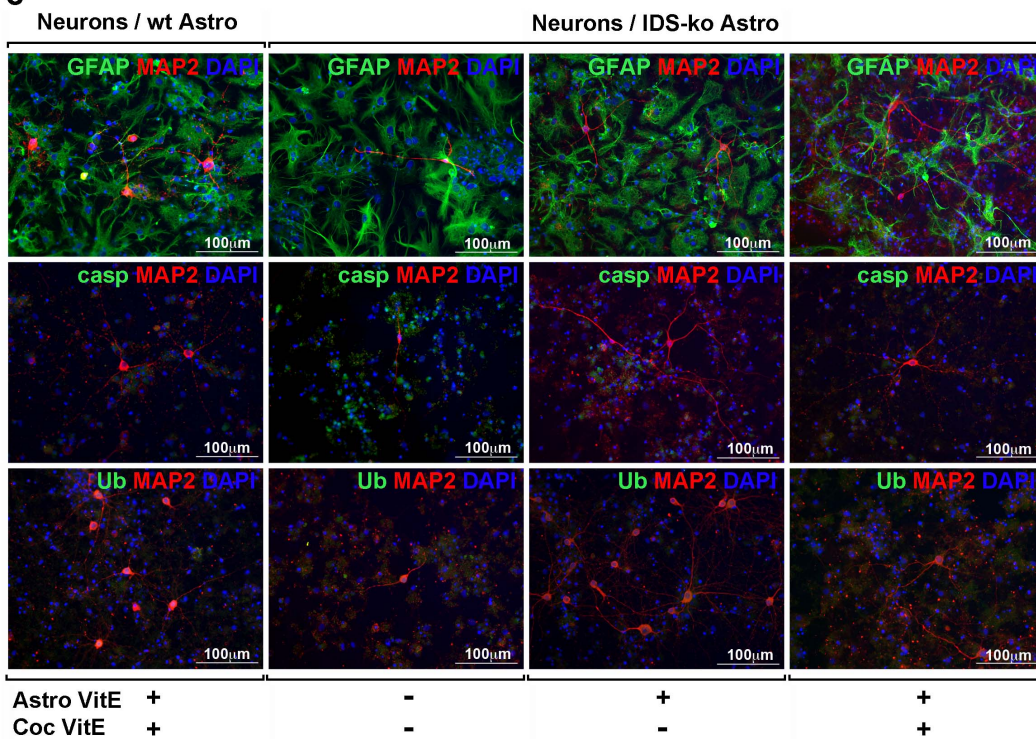

Figure S5

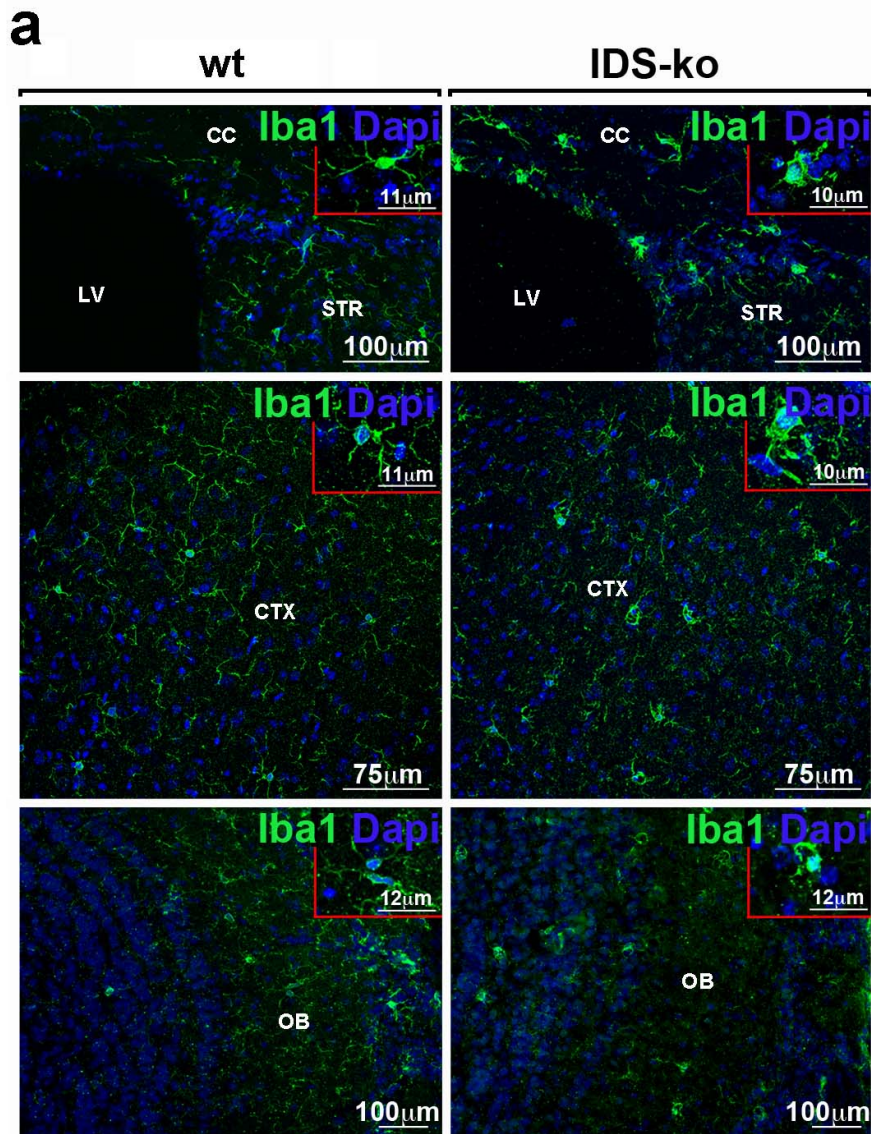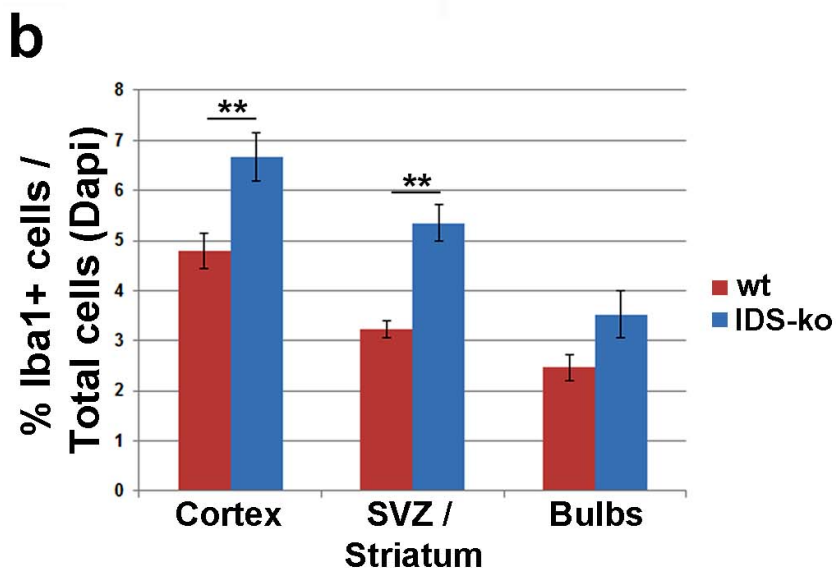

Supplement: cddis2016231x2.pdf [file cddis2016231x2.pdf]
